# Supplementary material for: Vanadium doped few-layer ultrathin MoS2 nanosheets on reduced graphene oxide for high-performance hydrogen evolution reaction
Source: Royal Society of Chemistry journal article supplement (doi:10.1039/c9ra03589c), 2019-01-01
Supplement: c9ra03589c1.pdf [file c9ra03589c1.pdf]

**Electrochemical measurements:** Electrochemical measurements were carried out with a three electrode system on a Metrohm autolab electrochemical workstation (Zahner, Germany). Briefly, a glassy carbon (GC) electrode with a diameter of 3 mm served as a substrate for the working electrode. Platinum disk electrode and Ag/AgCl (3.5 M KCl) were used as counter and reference electrodes, respectively. To prepare the working electrode, 10 mg of the catalysts were dispersed in the water- ethanol mixture (1:4) and 50  $\mu\text{L}$  of 5 wt% Nafion solutions, and further ultrasonicated to form a uniform black ink. Next, 10  $\mu\text{L}$  of catalyst ink was pipette onto the glassy carbon surface to result in a 1.3  $\text{mg cm}^{-2}$  loading for all samples including commercial Pt/C catalyst (20 wt%, Johnson Matthey). Further,  $\text{N}_2$  flow was used through the electrolyte in the cell for 30 min to saturate it. The Linear Sweep voltammetry (CV) experiments were performed in  $\text{N}_2$ -saturated 0.5 M aqueous  $\text{H}_2\text{SO}_4$  electrolyte solutions with a scan rate of 10  $\text{mV s}^{-1}$ . All potentials reported were referenced to the reversible hydrogen electrode (RHE) through a RHE calibration. Equation 1 was used for the conversion of potential from Ag/AgCl to RHE.

$$E_{\text{RHE}} = E_{\text{Ag/AgCl}} + 0.059\text{pH} + E_{\text{Ag/AgCl}}^0 \quad (1)$$

$$(E_{\text{Ag/AgCl}}^0 = +0.199\text{V})$$

The overpotential ( $\eta$ ) was calculated at different current density ( $x$ ) using Equation (2) as

$$\eta^x = E_{\text{RHE}} - 1.23 \quad (2)$$

Turnover frequency (TOF) was calculated using equation -

$$\text{TOF} = jS/4Fn \quad (3)$$

where  $S$  defines the area ( $\text{cm}^2$ ) of electrode with active materials,  $j$  represents the measured current density ( $\text{A cm}^{-2}$ ) at desired  $\eta$ ,  $F$  is the Faraday constant, the parameter 4 in denominator corresponds to number of electrons involved in OER reaction, and  $n$  represents the number of moles of the catalytic material on the working electrode. TOF was calculated with respect to metals as obtained by SEM-EDS analysis. Number of moles of metals per unit surface area can be obtained according to Equation 4, as

$$n^{\text{Ni}} = \text{catalyst loading} \times \% \text{ weight of Ni/Atomic weight of Ni} \quad (4)$$

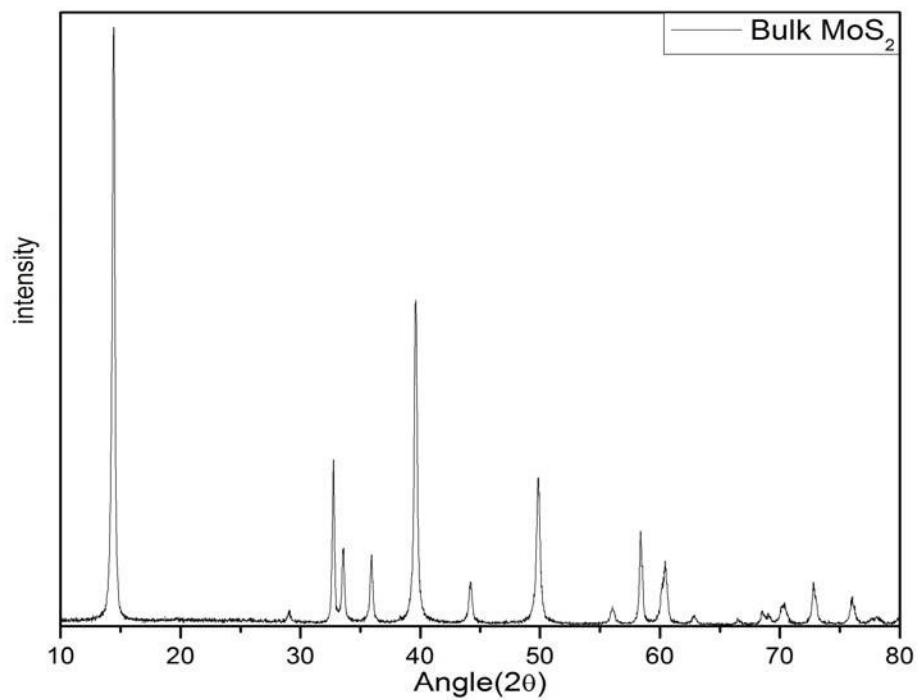

**Figure S1:** XRD of bulk MoS<sub>2</sub>.

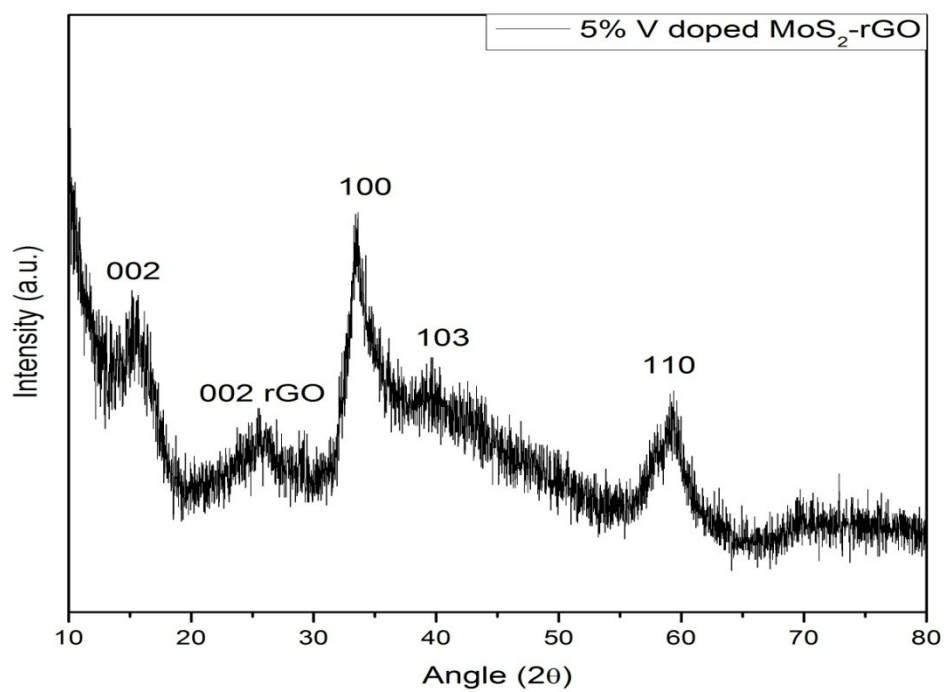

**Figure S2:** XRD of 5% V doped MoS<sub>2</sub>-rGO.

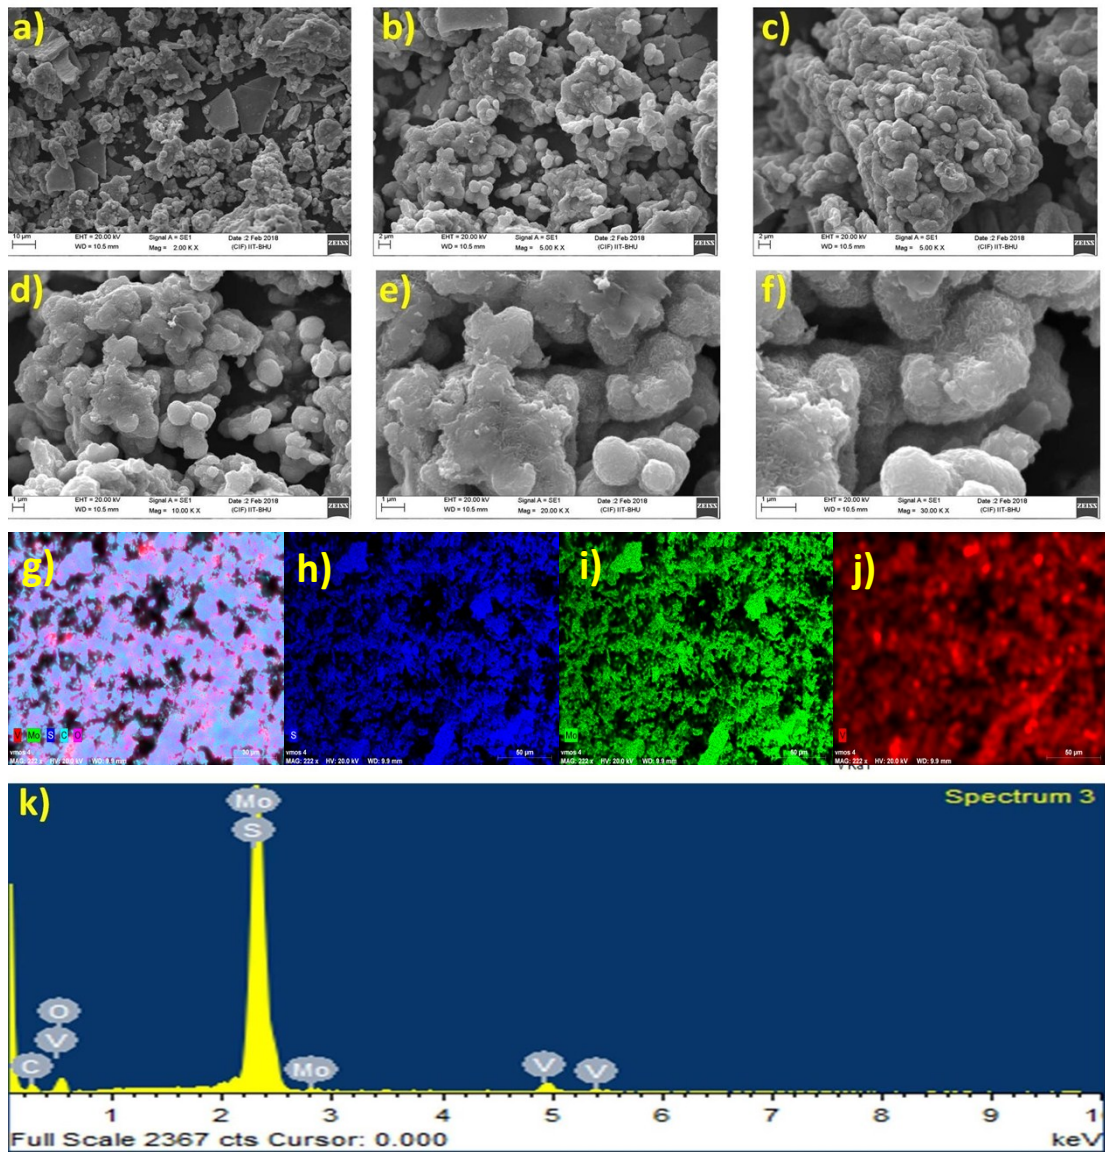

**Figure S3:** (a-f) SEM images, (g) collective element mapping, (h) S mapping, (i) Mo mapping, (j) V mapping, and (k) EDX spectrum of 5% V-doped MoS<sub>2</sub>-rGO

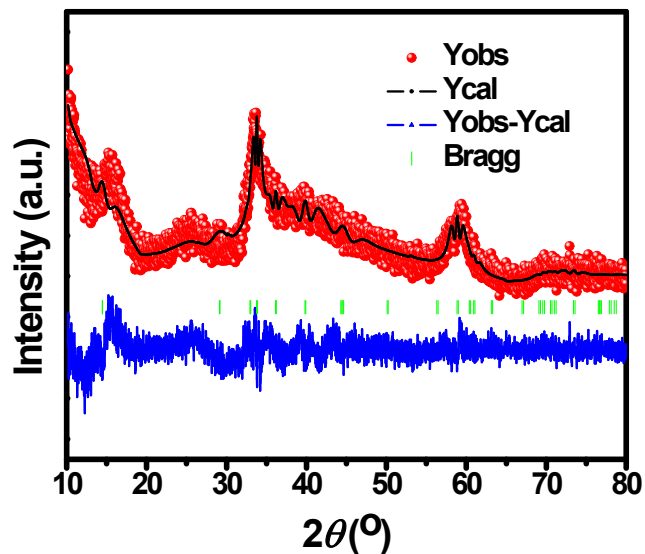

Figure S4: Le-bail profile fitting of MoS<sub>2</sub>-rGO.

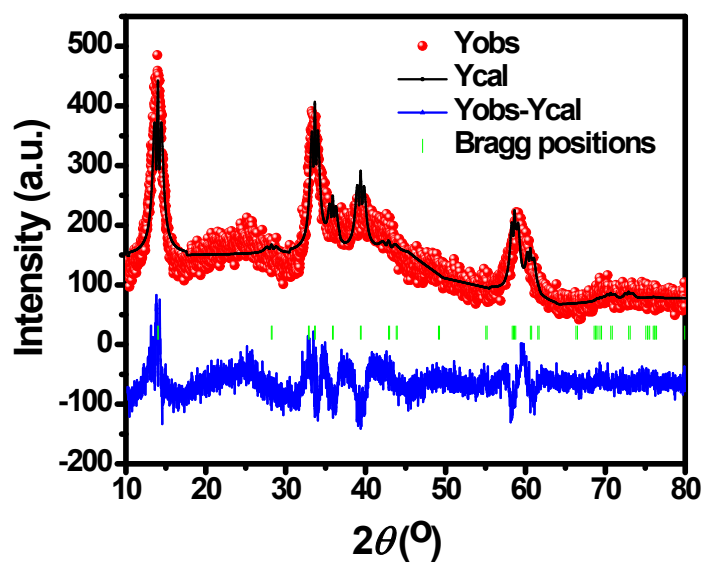

Figure S5: Le-bail profile fitting of 5% MoS<sub>2</sub>-rGO.

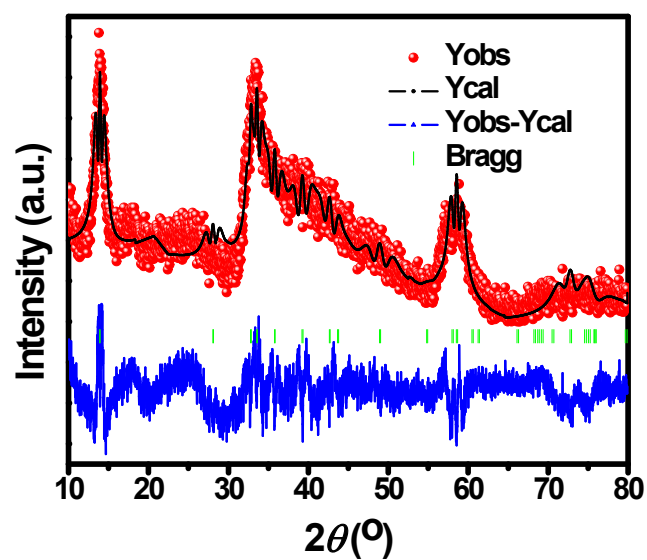

Figure S6: Le-bail profile fitting of 10% MoS<sub>2</sub>-rGO.

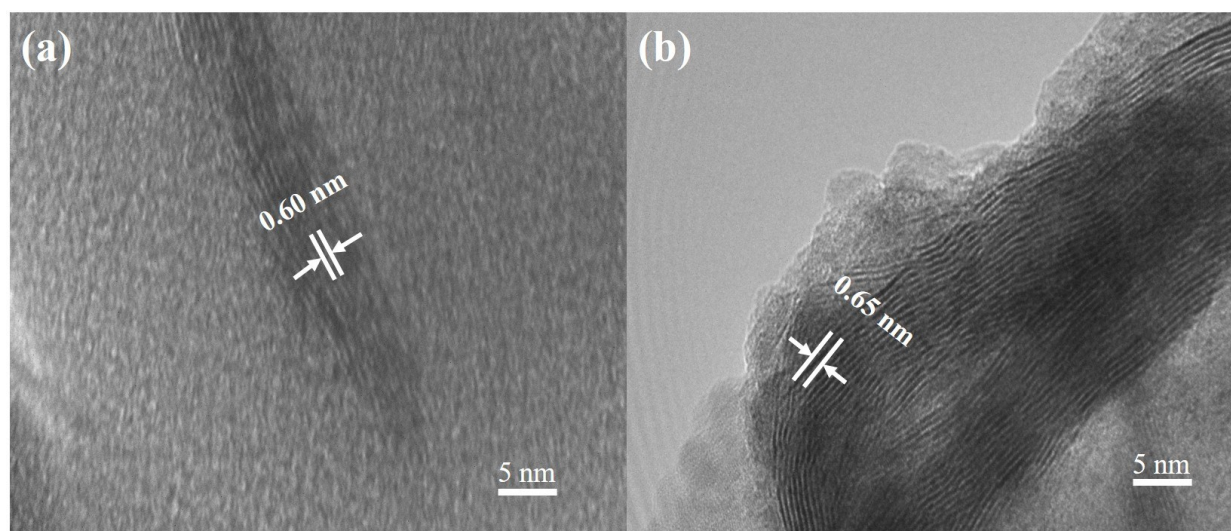

Figure S7: HRTEM of (a) undoped and (b) 10% V doped MoS<sub>2</sub>-rGO.

**Table S1:** Le-bail refinement parameters for MoS<sub>2</sub>-rGO, 5% and 10% V doped MoS<sub>2</sub>-rGO.

|                  | <b>MoS<sub>2</sub>-rGO</b> | <b>5% V doped MoS<sub>2</sub>-rGO</b> | <b>10% V doped MoS<sub>2</sub>-rGO</b> |
|------------------|----------------------------|---------------------------------------|----------------------------------------|
| a, b             | 3.137139                   | 3.1460                                | 3.151664                               |
| c                | 12.255086                  | 12.6447                               | 12.719102                              |
| Alpha, beta      | 90.0                       | 90.0                                  | 90.0                                   |
| gamma            | 120.0                      | 120.0                                 | 120.0                                  |
| Vol              | 104.451( 0.170)            | 108.383                               | 109.413( 4.058)                        |
| RF-factor        | 1.58                       | 1.39                                  | 1.58                                   |
| Bragg R-factor:  | 0.418                      | 0.906                                 | 2.48                                   |
| Rp               | 35.7                       | 68.7                                  | 31.7                                   |
| Rwp              | 38.8                       | 48.9                                  | 0.148E+04                              |
| Re               | 29.1                       | 30.1                                  | 17.3                                   |
| Chi <sup>2</sup> | 1.773                      | 2.645                                 | 7288.                                  |

**TableS2:** Comparative study of various catalysts for HER

| Electrocatalysts                              | Over potential(mV) | Tafel slope (mv/decade) | Electrolyte                             | Reference |
|-----------------------------------------------|--------------------|-------------------------|-----------------------------------------|-----------|
| Ni                                            | 370                | 118                     | 1M NaOH                                 | 51        |
| Pt                                            | 570                | 130                     | 8M KOH                                  | 52        |
| Ni-CNT                                        | 180                | N/A                     | 1M KOH                                  | 53        |
| MoS <sub>2</sub> NSs                          | 250                | 82                      | 0.5 M<br>H <sub>2</sub> SO <sub>4</sub> | 54        |
| MoS <sub>2</sub> /CNT                         | 199                | 61                      | 0.5 M<br>H <sub>2</sub> SO <sub>4</sub> | 54        |
| MoS <sub>2</sub> dots on Au                   | 201                | 82                      | 0.5 M<br>H <sub>2</sub> SO <sub>4</sub> | 55        |
| MoS <sub>2</sub> dots /nanosheet hybrid on Au |                    | 74                      | 0.5 M<br>H <sub>2</sub> SO <sub>4</sub> | 55        |
| Graphene coated Cu NW                         | 252                | 63                      | 0.5 M<br>H <sub>2</sub> SO <sub>4</sub> | 56        |
| MoS <sub>2</sub> NFs/rGO                      |                    | 95                      | 0.5 M<br>H <sub>2</sub> SO <sub>4</sub> | 57        |
| MoS <sub>2</sub> AGs/rGO                      |                    | 102                     | 0.5 M<br>H <sub>2</sub> SO <sub>4</sub> | 57        |
| V-doped MoS <sub>2</sub> /rGO composite       | 153                | 71                      | 0.5M<br>H <sub>2</sub> SO <sub>4</sub>  | Our work  |
